# Supplementary material for: A Poplar Rust Effector Protein Associates with Protein Disulfide Isomerase and Enhances Plant Susceptibility
Source: MDPI journal article supplement (doi:10.3390/biology9090294), 2020-09-16
Supplement: s1 [file s1]

Supplementary figures

# Figure S1

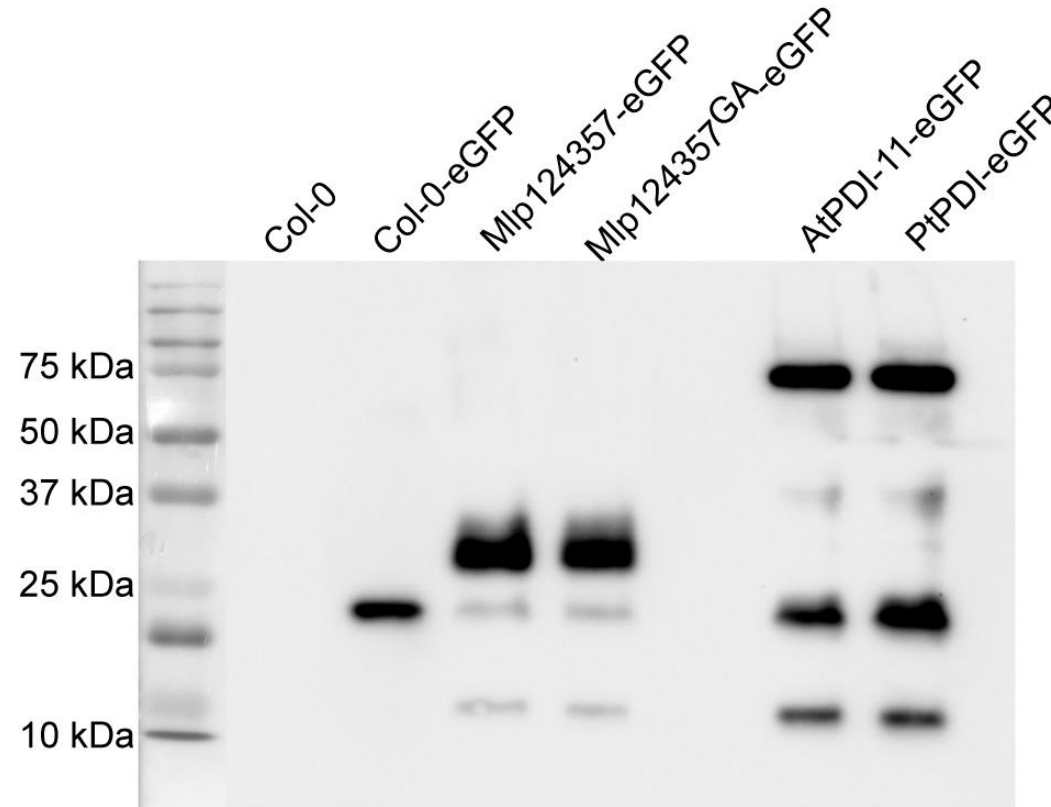

**Figure S1.** Immunodetection of eGFP protein in wild-type (Col-0) and stable transgenic seedlings expressing GFP, Mlp124357-eGFP, Mlp124357<sup>GA</sup>-eGFP, AtPDI-11-eGFP or PtPDI-eGFP from 14 days old plantlets.

# Figure S2

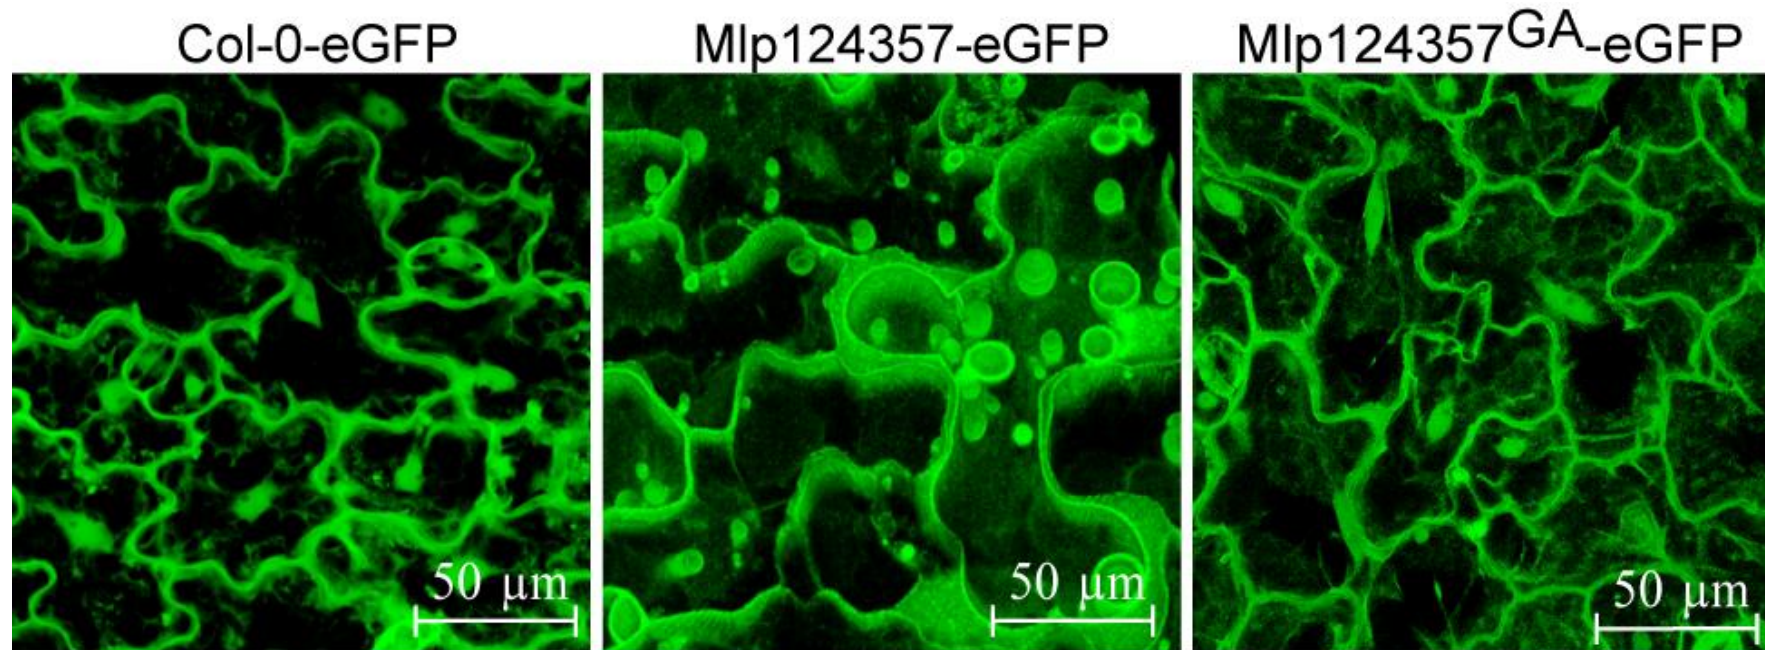

**Figure S2.** Mlp124357<sup>GA</sup> loses tonoplast localization in stable *Arabidopsis* transgenic line. Live-cell imaging of leaf epidermal cells of seven-day-old stable *Arabidopsis* eGFP, Mlp124357-eGFP or Mlp124357<sup>GA</sup>-eGFP transgenic line.

# Figure S3

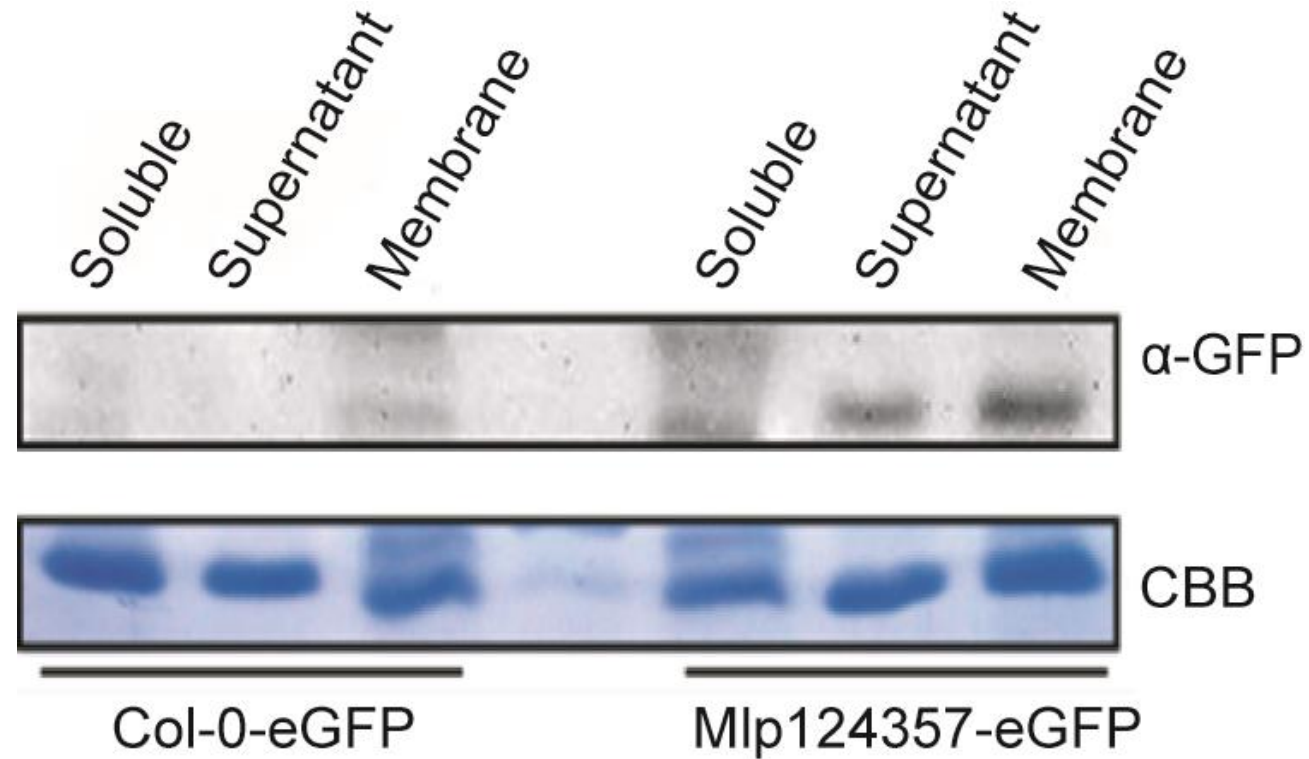

**Figure S3.** Distribution of Mlp124357-eGFP proteins in subcellular fractions. Cellular membrane fractions were obtained from fresh leaves of 3-week-old Col-0-eGFP and Mlp124357-eGFP plants by differential centrifugation and Mlp124357 was detected by Western hybridization with an antibody recognizing GFP .

# Figure S4.

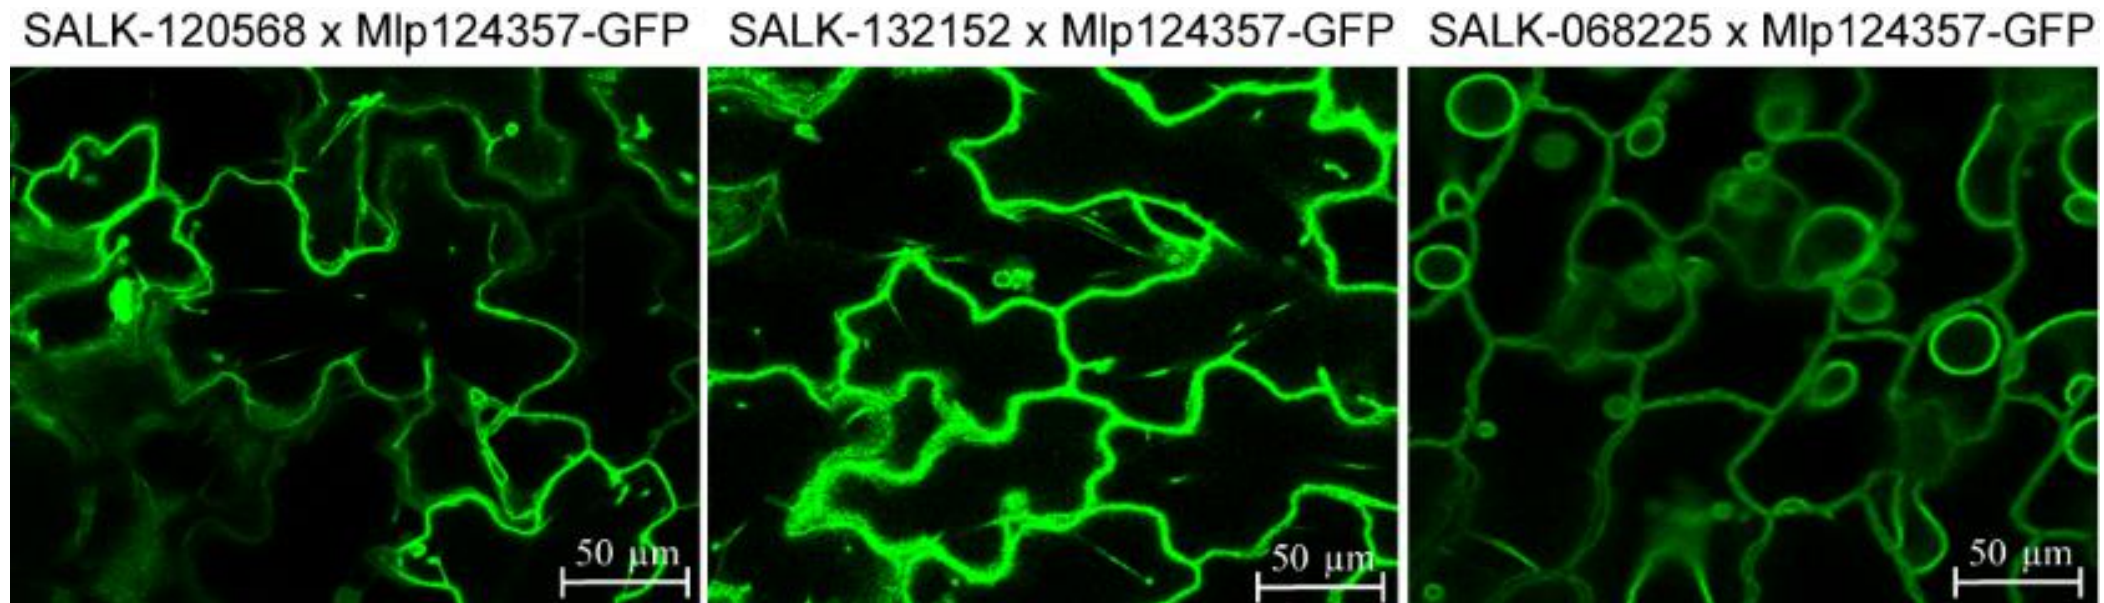

**Figure S4.** Mlp124357 tonoplast, bulbs, and TVSs localization does not change in the absence of AT2G33210, AT5G15650, and AT1G04040 genes in *Arabidopsis*. Live-cell imaging of leaf epidermal cells of the crossed lines between Mlp124357-eGFP with the indicated genes knock-out lines; SALK-120568, SALK-132152 or SALK-068225.

# Figure S5

|          |                                                                |     |
|----------|----------------------------------------------------------------|-----|
| MlpPDI   | ---MKSILVTLITILLFITTTNAGIFNSKGDVKAIDIDRLKKHLKTSSKGTFFVAFYAPWC  | 57  |
| AtPDI-11 | -MAKSQIWFGFALLALLV-----SAVADDVVVLTDSEFEK-EVGKDKGALVEFYAPWC     | 52  |
| PtPDI    | MERCNQIWYAFGMTALLAV-----SALADDVVVLTEDNFEK-EVGQDKGALVEFYAPWC    | 53  |
|          | ..* : : *: . ** : * : * ..*: * *****                           |     |
| MlpPDI   | GHCKSLQPEFEKAATNVKNL--VVFAAVDCDADQNKASCGRDYGKGFPTIKYFPGTPVA    | 115 |
| AtPDI-11 | GHCKKLAPEYEKLGASFKKAKSVLIAKVDCDEQ--K SVC-TKYGVSGYPTIQWFPKGSLE  | 109 |
| PtPDI    | GHCKKLAPEYEKLGSSFKKAKAVLIGKVDCDEH--KGVC-SKYGVSGYPTLQWFPKGSLE   | 110 |
|          | ****.* **.*. . . . * : : . * . * . * . * . * . * . * . * . *   |     |
| MlpPDI   | -MDYDQERKAKSMVDYSLRFMPTFAKK-----IKSKKDLQEKISKSSNDRPLVVLFT-     | 166 |
| AtPDI-11 | PQKYEGPRNAEALAEYVNKEGGTNVKLAAVPQNVVVLTPDNFDEIVLDQNKDVLVEFYAP   | 169 |
| PtPDI    | PKKYEGPRTAEALAEFVNNEGGSNVKIAAVTSSVVVLADNFNDIVLDENKDVLEFYAP     | 170 |
|          | . * : * . * : : : . : . * : . * : * . * . * . * : :            |     |
| MlpPDI   | ---TATATTPTFKSLSSVFHKKMEVYTATPKAIGEETAKELFSMESIPGLIVFK-GNTDY   | 222 |
| AtPDI-11 | WCGHCKSLAPTYEKVATVFKQEEGVVIANLDADAHKALGEKYGVSGFPTLKFFPKDNKAG   | 229 |
| PtPDI    | WCGHCKNLAPIYEKVATAFKSEEDVVVANLEADKYRDLAEKYGVSGFPTLKFFPKGNKAG   | 230 |
|          | .. : * : : : . * : : * * . * . * : : : * * . * . *             |     |
| MlpPDI   | EKFKGKMNYNTLYEFIKKELQLAEKSKSENQKA-----KDEL-----                | 259 |
| AtPDI-11 | HDYDGGRLDDFVFSFINEKSGTSRDSKGQLTSKAGIVESLDALVKELVAASEDEKKAVLS   | 289 |
| PtPDI    | EEYEGGRDLDDFVAFINEKAGTSRDGKGQLTSKAGIVESLDALVKEFVAAGDDEKKAVFS   | 290 |
|          | ...* : : : ** : : : . . . . * *                                |     |
| MlpPDI   | -----                                                          | 259 |
| AtPDI-11 | RIEEEASTLKGSTTRYGKLYLKLAKSYIEKGS DYASKETERLGRVLGKSI SPVKADELTL | 349 |
| PtPDI    | RIEEEVEKLKGSTARHGKIYLLKAAKTCMVKGAGYAKNEIERLQRMLEKSI SPAKADEFTL | 350 |
| MlpPDI   | -----                                                          | 259 |
| AtPDI-11 | KRNILTTFVASS                                                   | 361 |
| PtPDI    | KKNILSTFA---                                                   | 359 |

**Figure S5.** Multiple sequence alignment of PDIs. The amino acid sequence of AtPDI-11, PtPDI, and *Mlp*PDI was compared. Identical/highly conserved residues (\*); semi conserved residues (:); and conserved residues (.) are marked. The AtPDI-11 shows 87% and 30% of sequence identity with PtPDI and *Mlp*PDI, respectively.



# Figure S6

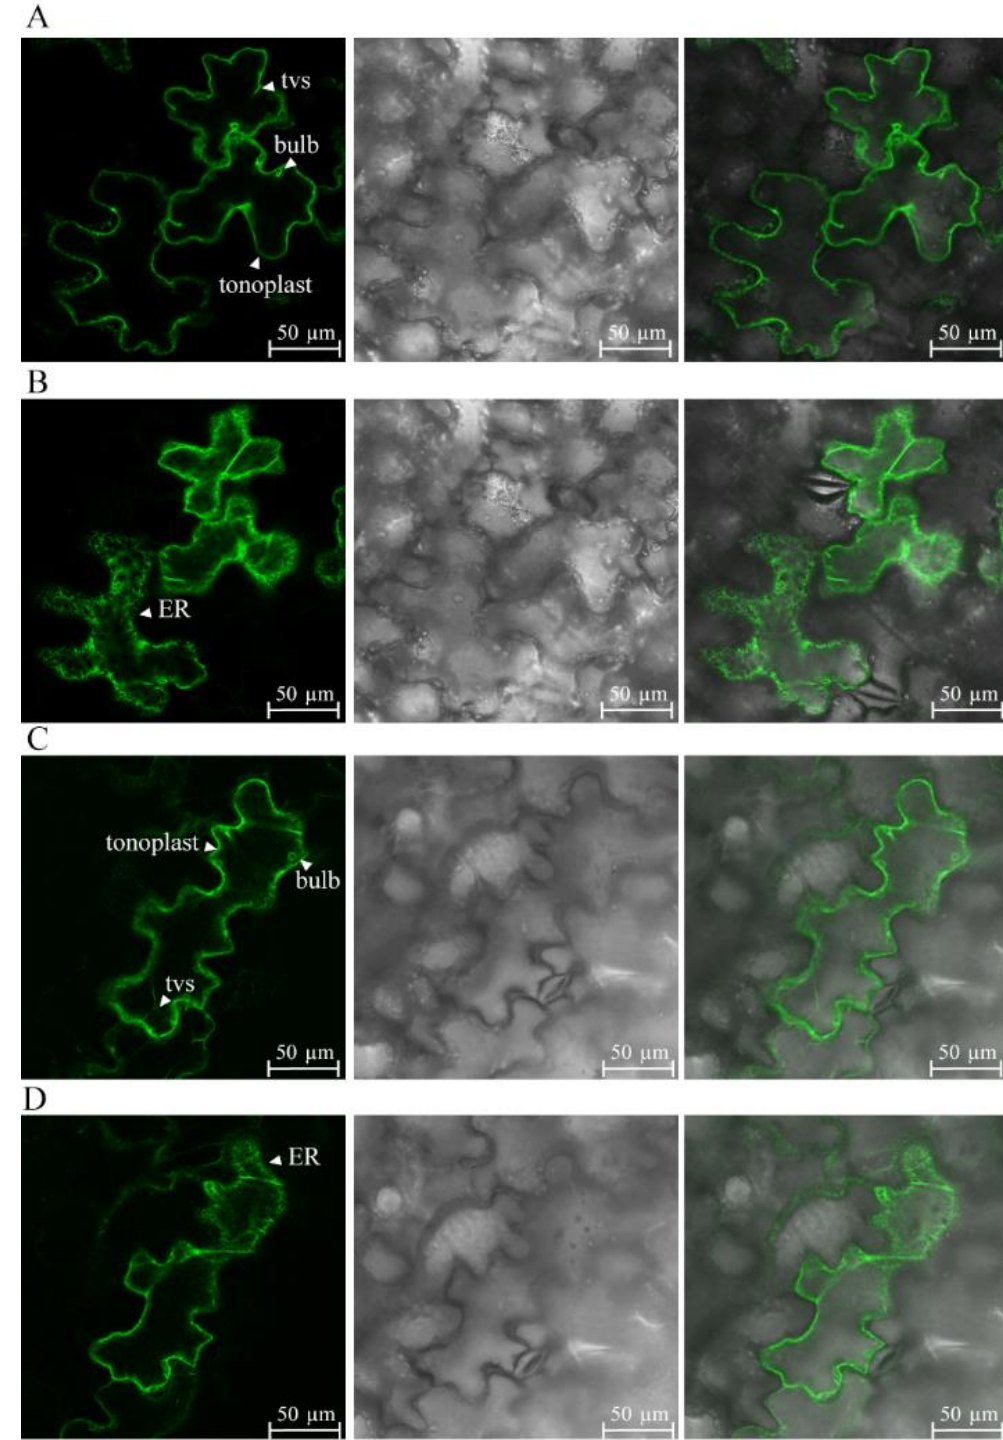

**Figure S6.** Sub-cellular localization of AtPDI-11 or PtPDI in *N. benthamiana* epidermal cells. Laser-scanning confocal microscopy shows that AtPDI-11-eGFP (A-B) and PtPDI-eGFP (C-D) accumulates in both in the tonoplast and endoplasmic reticulum (ER).

Figure S7.

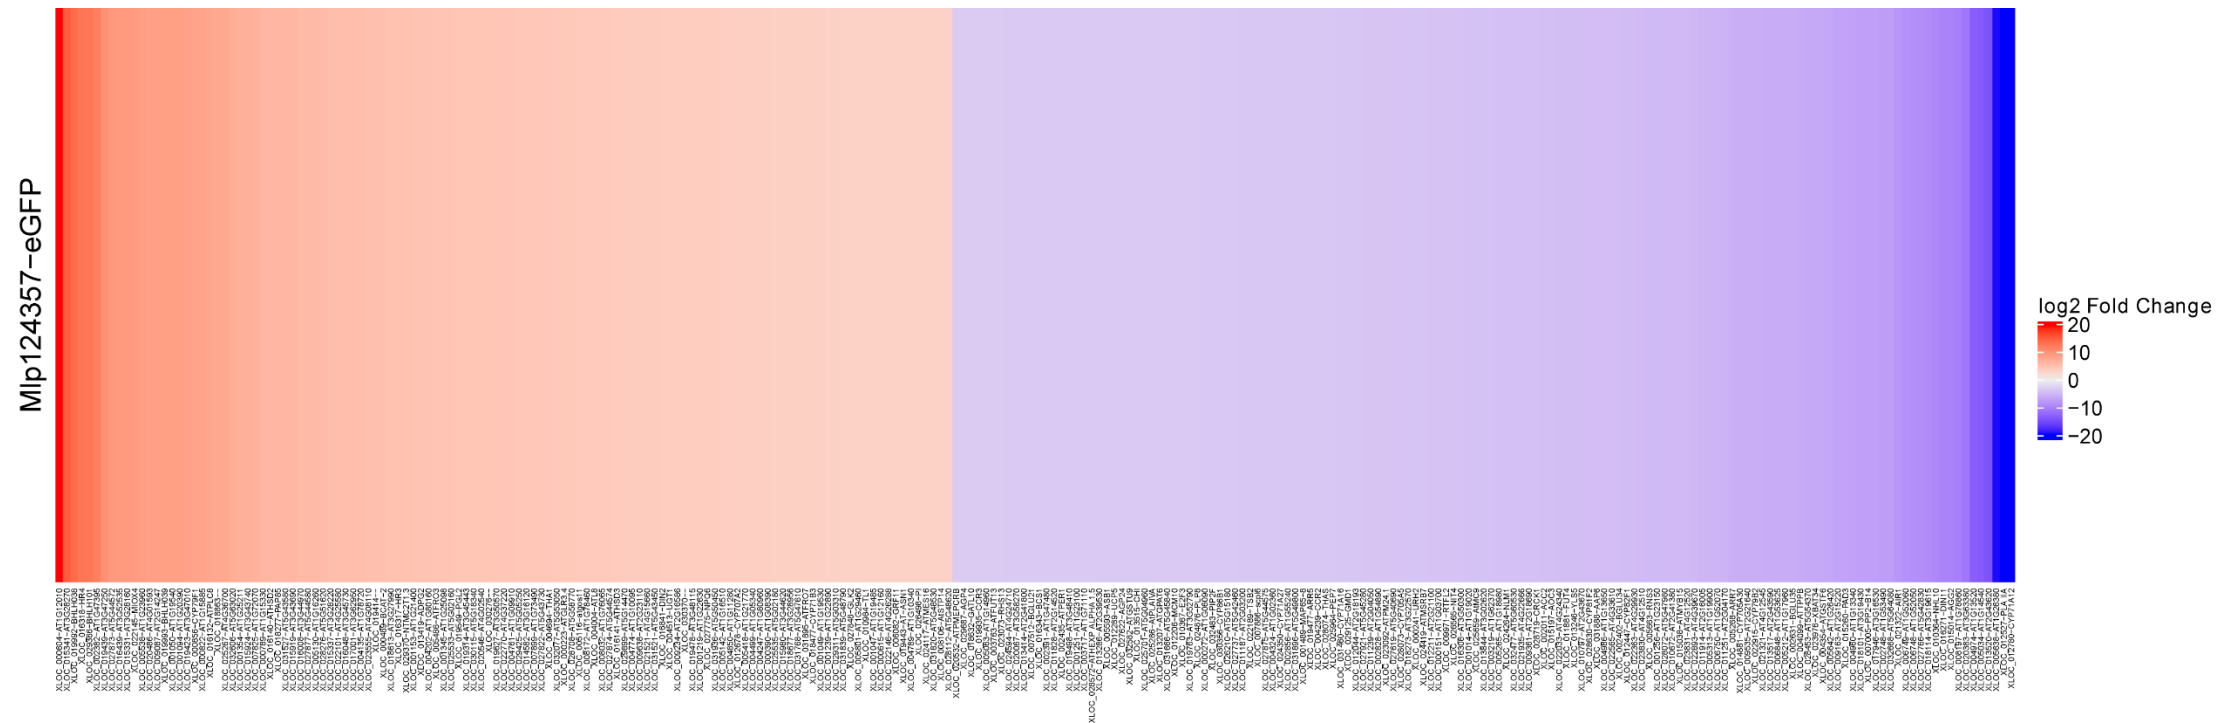

Figure S7. Heatmap of differentially expressed genes in Col-0-GFP and Mlp124357-eGFP based on transcriptome analysis.
